1 **Prevalence and correlates of urogenital schistosomiasis**  
2 **in school going children in Maramba compound of**  
3 **Livingstone District, Zambia**

4 Shike Kapanga, John Amos Mulemena, Kingsley Kamvuma, Christopher Newton Phiri,  
5 Warren Chanda\*

6 *Mulungushi University School of Medicine and Health Sciences, Department of Pathology and*  
7 *Microbiology, Livingstone Zambia*

8 **\*Corresponding author:** Mr. Warren Chanda, Mulungushi University School of Medicine  
9 and Health Sciences, Department of Pathology and Microbiology, Livingstone Zambia.

10 [chandawarren@yahoo.com](mailto:chandawarren@yahoo.com).

11

12

## 13 Abstract

14 **Background.** Schistosomiasis is an acute and chronic parasitic disease that is caused by  
15 trematode worms (blood flukes) of the genus *Schistosoma*. *Schistosoma haematobium* (*S.*  
16 *haematobium*) is known to cause urogenital schistosomiasis. The disease is the second  
17 most common socio-economically devastating tropical parasitic disease after malaria in  
18 Africa. In Zambia, it affects over a million school going children, mostly in rural  
19 communities due to unsafe water and inadequate sanitation facilities. This study aimed to  
20 determine the presence of *S. haematobium* in urine specimens of school going children in  
21 Maramba compound of Livingstone and establish factors associated with the acquisition  
22 and spread of the parasite. **Methods.** A structured questionnaire was administered on all  
23 children with signed consent from their guardians/parents and afterward spot urine  
24 specimens were collected in sterile containers for macroscopically/microscopically  
25 examination by an independent laboratory technologist. **Results:** A total of 173 school  
26 going children participated in the study. Parasitic eggs were detected in 6 specimens  
27 providing a prevalence of 3.47% ( $p < 0.01$ ) and this had a strong association with presence  
28 of microscopic red blood cells ( $p < 0.01$ ), dysuria ( $p = 0.026$ ), washing in a stream ( $p = 0.01$ ),  
29 and the perception on bilharzia acquisition ( $p < 0.01$ ). **Conclusion.** The prevalence of  
30 urogenital schistosomiasis among school going children in Maramba compound was 3.47%,  
31 and the correlates of the infection included washing in a stream, older age and poor  
32 knowledge on schistosomiasis. Participants that had schistosomiasis often presented with  
33 hematuria and lacked knowledge on disease acquisition, health effects and preventive

34 measures. This calls for more robust sensitization of school going children and periodic  
35 screening to curb the disease.

36 **Key words:** Bilharzia, *Schistosoma haematobium*, Schistosomiasis, Urine, Zambia

37

## 38 Introduction

39 Schistosomiasis is an acute and chronic parasitic disease that is caused by trematode  
40 worms (blood flukes) of the genus *Schistosoma*. This genus causes 2 major forms of  
41 schistosomiasis (intestinal and urogenital) with 5 main species of blood flukes such as  
42 *Schistosoma mansoni*, *Schistosoma japonicum*, *Schistosoma mekongi*, *Schistosoma guineensis*,  
43 and *Schistosoma haematobium*; and the three most common are *S. haematobium*, *S.*  
44 *japonicum*, and *S. mansoni* (1, 2). *Schistosoma haematobium* is known to cause urogenital  
45 schistosomiasis. The disease is the second most common socio-economically devastating  
46 tropical parasitic disease after malaria in Africa (3). Schistosomiasis infects over 230  
47 million people annually and causes a worldwide burden of over 3 million disability-  
48 adjusted life years (4-6). The World Health Organization (WHO) recognizes schistosomiasis  
49 as a Neglected Tropical Disease (NTD) with endemicity in 78 tropical and sub-tropical  
50 countries (7, 8), thus making it a disease of public health concern.

51 Studies have indicated that exposure to infested water by people during routine  
52 agricultural, domestic, occupational, and recreational activities, is the main channel of  
53 disease transmission (9, 10). The life cycle of schistosome occurs in snails and mammals. In  
54 the snail, the process starts with the development of miracidia into a sporocyst which later

55 grow and multiply into cercariae, the developmental stages that further grow and mature  
56 into full grown parasites that mate and produce eggs in mammalian hosts (2). Through  
57 urine or feces, eggs are released into the environment from mammalian hosts and hatch  
58 into miracidia that subsequently infect snails in fresh water (11).

59 Children are at increased risk of contracting the disease. Certain recreational activities such  
60 as swimming or fishing in infested water and lack of hygiene put school-aged children  
61 vulnerable to infection (3). Male and female *Schistosoma* worms have the ability to avoid  
62 the host immunity and can localize in the pelvic venous plexus for decades. Eggs deposited  
63 in the bladder wall are resistant to T-helper-1(Th1) cell elimination through formation of  
64 fibrous capsule and progressive bladder disease which leads to complications such as  
65 obstructive uropathy and predisposition to squamous cell carcinoma (3).

66 Globally, the prevalence of schistosomiasis has been associated with poor sanitary  
67 conditions and consumption of untreated water. In Africa, several studies indicate the  
68 increased prevalence of the disease in school-going children. For instance, 57.6%  
69 prevalence was reported in 12 villages of Niakhar region of Fatick, Senegal among school-  
70 going children aged 7-15 years (12), a mean prevalence of *S. haematobium* was 30.7% in  
71 Zanzibar (13), and the prevalence of 52.0% was recorded in age group 11 – 20 years in a  
72 rice-farming community in Adim Village in Biase area of Cross River State, Nigeria (14).  
73 These studies suggested that the rural communities in African countries are mostly  
74 affected.

75 In Zambia, rapid changes in environmental factors and social economic factors are linked to  
76 infections due to *S. haematobium*. The infection affects more than 4 million school-aged

77 children, mostly in rural communities due to unsafe water and inadequate sanitation  
78 facilities (15). A meta-analysis study revealed a 32.2% prevalence estimate of *S.*  
79 *haematobium* across studies for the entire period among school-aged children (15). Despite  
80 the implementation of massive drug administration (MDA) by the Ministry of Health to  
81 curb the disease, sporadic cases are being reported by various hospitals in Zambia. Thus,  
82 periodic monitoring of the program is important to understand the situational status.  
83 Maramba compound(Figure 1) in the town of Livingstone, is a peri-urban area attached to  
84 the stream with a total population of 9590, of which 2747 (29%) were children aged 10-19  
85 years.(16) The stream is used for various human activities such as gardening swimming,  
86 fishing, washing etc. and we hypothesized that it might be infested with *Schistosoma*  
87 vectors. Therefore, this study aimed to determine the presence of *S. haematobium* in urine  
88 specimens of school going children in Maramba compound of Livingstone and establish  
89 factors associated with the acquisition and spread of the parasite.

90 **Figure 1: The geographical location of Maramba compound.** The map of Zambia (A)  
91 zoomed from the map of Africa (B), map of Livingstone city (C), and the study site-  
92 Maramba compound with Maramba river (D). courtesy of Thomas Brinkhoff (16)

93

## 94 **Methods and Materials**

95 A cross-sectional study was conducted on school going children at Maramba Primary  
96 School in Maramba compound of Livingstone city after obtaining ethical clearance (SMHS-  
97 MU2-2020-21) from Mulungushi University School of Medicine and Health Sciences

98 Research Ethics committee and permission from Livingstone District Health office. The  
99 School registers were used to randomly select participant using a systematic sampling  
100 method. From the register, every fourth name was selected for the study and all pupils (6-  
101 16years old) that visited the out-patient department at Maramba Clinic were also randomly  
102 selected for the study.

103 A structured questionnaire was administered on all children with signed consent from  
104 their guardians/parents and afterward spot urine specimens were collected in sterile  
105 containers for macroscopically/microscopically examination by an independent laboratory  
106 technologist. However, school going children whose guardians/parents refused to sign the  
107 consent form, or had taken medication for schistosomiasis 2 weeks prior to sample  
108 collection were excluded from the study.

109 The outcome study variable was the detection of *S. haematobium* eggs in urine specimen  
110 while the independent variables included age, gender, water source, sanitation levels,  
111 proximity to stream, swimming in contaminated water, previous UTI diagnosis, UTI  
112 medication history, headache, fever, myalgia, rash, dysuria, and microscopic red blood cells  
113 in urine.

114 Data was entered, cleaned and coded in Microsoft Excel 2019 then exported and analyzed  
115 using STATA version 15. Descriptive statistics using tables, frequencies, means and  
116 medians were utilized to describe the data. A chi-square test was used for categorical  
117 variables and logistic regression was used to analyze the logarithmic transformation of the  
118 odds of the associated variables. A p-value of  $\leq 5\%$  was considered statistically significant.

## 119 **Results**

### 120 **Demographic and clinical characteristics**

121 A total of 173 school going children participated in the study. Out of 173, 57.23% (99) were  
122 females and 42.77% (74) were males with the age ranging from 10-16 years (mean age:  
123 12). Among the participants, 98.27%, (170) had no history of urinary tract infection (UTI),  
124 97.69% (169) had no history of UTI medication, 72.83% (126) took undisinfected drinking  
125 water, 91.91% (159) had piped water, 63.01% (109) used flushable toilets, and 82.66%  
126 (143) had no history of swimming in the stream as presented in Table 1.

127 Studies have revealed that trapped parasitic eggs induce a distinct immune-mediated  
128 granulomatous response that causes pathological effects ranging from anemia, growth  
129 stunting, impaired cognition, and decreased physical fitness, to organ-specific effects such  
130 as severe hepatosplenism, periportal fibrosis with portal hypertension, and urogenital  
131 inflammation and scarring (17). Few weeks after infection, some people may present with  
132 fever, an itchy and raised rash, muscle and joint pain, and general body malaise (18, 19). In  
133 our study, the majority of participants were asymptomatic; afebrile, no headache, no  
134 dysuria and body aches, no skin rash and were not anemic (Table 1).

135 Moreover, we assessed the children's perception towards bilharzia acquisition, health  
136 effects and infection prevention. Despite bilharzia lessons being taught in primary  
137 education science subjects, 71.1% (127) indicated that bilharzia could be acquired through  
138 contact with contaminated water while 15.03% (26) declined to respond (Table 1). On  
139 health effects associated with bilharzia, blood loss stood out the most with 42.2% (73)

140 whereas avoiding bathing in contaminated water (41.62%, 72) and handwashing before  
141 eating (24.28%, 42) were identified as infection preventive measures (Table 1).

142 Laboratory findings revealed presence of red blood cells and Schistosoma cysts in 3.47%  
143 (6) of the urine specimens analyzed (Table 1).

144 **Table 1: Frequencies of demographic and clinical characteristics of the study**  
145 **participants**

| <b>Variable</b>               | <b>Mean (IQR)</b> | <b>Frequency</b> | <b>Percent (%)</b> |
|-------------------------------|-------------------|------------------|--------------------|
| <b>Age child</b>              | 12.9(10,16)       |                  |                    |
| <b>Gender child</b>           |                   |                  |                    |
| Male                          |                   | 74               | 42.77              |
| Female                        |                   | 99               | 57.23              |
| <b>Previous UTI diagnosis</b> |                   |                  |                    |
| Yes                           |                   | 3                | 1.73               |
| No                            |                   | 170              | 98.27              |
| <b>UTI medication history</b> |                   |                  |                    |
| Yes                           |                   | 3                | 1.73               |



|                                    |  |     |       |
|------------------------------------|--|-----|-------|
| No                                 |  | 170 | 98.27 |
| <b>Toilet Used</b>                 |  |     |       |
| Latrine                            |  | 64  | 36.99 |
| Flushable toilet                   |  | 109 | 63.01 |
| No Toilet                          |  | 0   | 0     |
| <b>Source of Water</b>             |  |     |       |
| Stream                             |  | 2   | 1.16  |
| Tapwater                           |  | 159 | 91.91 |
| Borehole                           |  | 12  | 6.94  |
| Well                               |  | 0   | 0     |
| <b>Disinfecting Drinking Water</b> |  |     |       |
| Yes                                |  | 47  | 27.17 |
| No                                 |  | 126 | 72.83 |
| <b>Living near a stream</b>        |  |     |       |

|                                            |  |     |       |
|--------------------------------------------|--|-----|-------|
| Yes                                        |  | 28  | 16.18 |
| No                                         |  | 145 | 83.82 |
| <b>Washing in a Stream</b>                 |  |     |       |
| Yes                                        |  | 12  | 6.94  |
| No                                         |  | 161 | 93.06 |
| <b>Swimming in a Stream</b>                |  |     |       |
| Yes                                        |  | 30  | 17.34 |
| No                                         |  | 143 | 82.66 |
| <b>Perception on Bilharzia acquisition</b> |  |     |       |
| eating unwashed foods                      |  | 3   | 1.73  |
| walking barefoot in contaminated soil      |  | 8   | 4.62  |
| contact with contaminated water            |  | 123 | 71.1  |
| mosquito bite                              |  | 7   | 4.62  |

|                                               |  |    |       |
|-----------------------------------------------|--|----|-------|
| no response                                   |  | 26 | 15.03 |
| Other (urinating in dirty water)              |  | 6  | 3.47  |
| <b>Perception on Bilharzia Health Effects</b> |  |    |       |
| blood loss                                    |  | 73 | 42.2  |
| anemia & malnutrition                         |  | 22 | 12.72 |
| disturbs children's growth                    |  | 20 | 11.56 |
| disturbs learning well                        |  | 13 | 7.51  |
| causes chronic severe disease                 |  | 30 | 17.34 |
| no response                                   |  | 15 | 8.67  |
| <b>Perception on Infection Prevention</b>     |  |    |       |
| Defecating/urinating in latrines              |  | 22 | 12.72 |

|                                     |  |     |       |
|-------------------------------------|--|-----|-------|
| Avoid bathing in contaminated water |  | 72  | 41.62 |
| wash hands before eating            |  | 42  | 24.28 |
| Other                               |  | 35  | 20.23 |
| no response                         |  | 2   | 1.16  |
| <b>Past Bilharzia diagnosis</b>     |  |     |       |
| Yes                                 |  | 16  | 9.25  |
| No                                  |  | 157 | 90.75 |
| <b>Headache</b>                     |  |     |       |
| Yes                                 |  | 42  | 24.28 |
| No                                  |  | 131 | 75.72 |
| <b>Fever</b>                        |  |     |       |
| Yes                                 |  | 31  | 17.92 |

|                             |  |     |       |
|-----------------------------|--|-----|-------|
|                             |  |     |       |
| No                          |  | 142 | 82.08 |
| <b>Body aches</b>           |  |     |       |
| Yes                         |  | 27  | 15.61 |
| No                          |  | 146 | 84.39 |
| <b>Rash</b>                 |  |     |       |
| Yes                         |  | 7   | 4.05  |
| No                          |  | 166 | 95.95 |
| <b>Dysuria</b>              |  |     |       |
| Yes                         |  | 15  | 8.67  |
| No                          |  | 158 | 91.33 |
| <b>History of hematuria</b> |  |     |       |

|                             |  |     |       |
|-----------------------------|--|-----|-------|
|                             |  |     |       |
| Yes                         |  | 19  | 10.98 |
| No                          |  | 154 | 89.02 |
| <b>Anemic</b>               |  |     |       |
| Yes                         |  | 7   | 4.05  |
| No                          |  | 166 | 95.95 |
| <b>Antibiotics</b>          |  |     |       |
| Yes                         |  | 1   | 0.58  |
| No                          |  | 172 | 99.42 |
| <b>Deworming medication</b> |  |     |       |
| Yes                         |  | 26  | 15.03 |
| No                          |  | 147 | 84.97 |

|                                    |  |     |       |
|------------------------------------|--|-----|-------|
|                                    |  |     |       |
| <b>Microscopic red blood cells</b> |  |     |       |
| Yes                                |  | 6   | 3.47  |
| No                                 |  | 167 | 96.53 |
| <b>Schistosoma cyst in urine</b>   |  |     |       |
| Yes                                |  | 6   | 3.47  |
| No                                 |  | 167 | 96.53 |

146

147 **Prevalence of *Schistosoma haematobium* infection and related**  
148 **factors**

149 The presence of Schistosoma cysts in urine denoted urogenital schistosomiasis infection.

150 The cysts were detected in 6 specimens providing a prevalence of 3.47% ( $p < 0.01$ ) and this

151 had a strong association with presence of microscopic red blood cells ( $p < 0.01$ ), dysuria

152 ( $p = 0.026$ ), washing in a stream ( $p = 0.01$ ), and the perception on bilharzia acquisition

153 ( $p < 0.01$ ) as presented in Table 2.

154 Among the 6 participants that had schistosomiasis 33.33% (2) washed their clothes in a  
 155 stream (p=0.01) while 66.67% (4) did not. On the acquisition of the disease, 50% (3)  
 156 mentioned obtaining it via urinating in dirty water, 33.33% (2) declined to respond while  
 157 16.67% (1) indicated as being through mosquito bites (Table 2). However, participants  
 158 without the disease thought that coming into contact with contaminated water was a way  
 159 of contracting bilharzia (73.65%, 123; p<0.01).

160 Understanding the health effects that bilharzia impact on affected individuals may help in  
 161 identifying it sooner and cause them to seek medical attention. In our study, participants  
 162 who were negative for the disease indicated that blood loss (43.11%, 72) is a health effect  
 163 of bilharzia whereas amongst the 6 participants detected with bilharzia; health effects  
 164 chosen were blood loss (16.67%, 1), disturbs learning (33.33%, 2), causes chronic severe  
 165 disease (16.67%, 1), but 33.33% (2) declined to respond (p=0.026, Table 2).

166 **Table 2: Prevalence and correlates of *Schistosoma haematobium* infection**

| Variable                    | Number | S. haematobium |             | P-value     |
|-----------------------------|--------|----------------|-------------|-------------|
|                             |        | Yes            | No          |             |
|                             |        | 6(3.47%)       | 167(96.53%) |             |
| <b>Age child Mean (IQR)</b> |        | 15(13,16)      | 13(10,16)   | <b>0.4</b>  |
| <b>Washing in a Stream</b>  | 173    |                |             | <b>0.01</b> |
| Yes                         |        | 2(33.33)       | 10(5.99)    |             |
| No                          |        | 4(66.67)       | 157(94.01)  |             |



|                                               |     |          |            |                 |
|-----------------------------------------------|-----|----------|------------|-----------------|
|                                               |     |          |            |                 |
| <b>Perception on Bilharzia Acquisition</b>    | 173 |          |            | <b>&lt;0.01</b> |
| eating unwashed foods                         |     | 0        | 3(1.80)    |                 |
| walking barefoot in contaminated soil         |     | 0        | 8(4.79)    |                 |
| contact with contaminated water               |     | 0        | 123(73.65) |                 |
| mosquito bite                                 |     | 1(16.67) | 6(3.59)    |                 |
| no response                                   |     | 2(33.33) | 24(15.03)  |                 |
| Other (urinating in dirty water)              |     | 3(50)    | 3(3.47)    |                 |
| <b>Perception on Bilharzia Health Effects</b> | 173 |          |            | <b>0.026</b>    |
| blood loss                                    |     | 1(16.67) | 72(43.11)  |                 |

|                               |     |          |            |                 |
|-------------------------------|-----|----------|------------|-----------------|
| anemia & malnutrition         |     | 0        | 22(13.17)  |                 |
| disturbs children's growth    |     | 0        | 20(11.98)  |                 |
| disturbs learning well        |     | 2(33.33) | 11(6.59)   |                 |
| causes chronic severe disease |     | 1(16.67) | 29(17.37)  |                 |
| no response                   |     | 2(33.33) | 13(7.78)   |                 |
| <b>Dysuria</b>                | 173 |          |            | <b>0.029</b>    |
| Yes                           |     | 2(33.33) | 13(7.78)   |                 |
| No                            |     | 4(66.67) | 154(92.22) |                 |
| <b>Hematuria</b>              | 173 |          |            | <b>&lt;0.01</b> |
| Yes                           |     | 6(100)   | 13(7.78)   |                 |
| No                            |     | 0        | 154(92.22) |                 |

|                                    |     |        |          |                 |
|------------------------------------|-----|--------|----------|-----------------|
| <b>Microscopic red blood cells</b> | 173 |        |          | <b>&lt;0.01</b> |
| Yes                                |     | 6(100) | 0        |                 |
| No                                 |     | 0      | 167(100) |                 |
| <b>Schistosoma cyst in urine</b>   | 173 |        |          | <b>&lt;0.01</b> |
| Yes                                |     | 6(100) | 0        |                 |
| No                                 |     | 0      | 167(100) |                 |

167

## 168 **Univariable and Multivariable analysis of factors associated** 169 **with schistosomiasis**

170 During univariable analysis it was found that an increase in age was associated with an  
 171 increased chance of having schistosomiasis (OR 1.22;95%CI: 1.41-5.84, p= 0.004) as shown  
 172 in Table 3. Although statistically insignificant, participants who were male had an increased  
 173 chance of acquiring schistosomiasis as compared to those that were female (OR 2.77;  
 174 95%CI: 0.49-15.56, p=0.247). It was also discovered that people that never washed their  
 175 clothes in the stream had reduced odds of having schistosomiasis as compared to those  
 176 that washed clothes in the stream (OR 0.127; 95%:CI 0.021-0.781, p=0.026).

177 During multivariable analysis only age was found to be statistically significant ( $p=0.011$ ). It  
 178 was observed that an increase in age was associated with an increased odds of acquiring  
 179 schistosomiasis (OR 2.86; 95%CI: 1.27-6.44;  $p= 0.011$ ), this was supported by a linear  
 180 regression analysis ( $R^2: 0.063$ ,  $p=0.001$ ).

181 **Table 3: Univariable and multivariable analysis of correlates of schistosomiasis**

| Variables                      | Crude Analysis |            |         | Adjusted Analysis |            |         |
|--------------------------------|----------------|------------|---------|-------------------|------------|---------|
|                                | OR             | 95%CI      | P-value | OR                | 95%CI      | P-value |
| <b>Age of Child Mean (IQR)</b> | 2.87           | 1.41-5.84  | 0.004   | 2.86              | 1.27-6.44  | 0.011   |
| <b>Gender of child</b>         |                |            |         |                   |            |         |
| Female                         | REF            |            |         |                   |            |         |
| Male                           | 2.77           | 0.49-15.56 | 0.247   | 5.45              | 0.66-44    | 0.115   |
| <b>Toilet used</b>             |                |            |         |                   |            |         |
| Pit Latrine                    | REF            |            |         |                   |            |         |
| Flushable toilet               | 0.85           | 0.15-4.76  | 0.85    | 0.62              | 0.086-5    | 0.644   |
| <b>Living near a Stream</b>    |                |            |         |                   |            |         |
| Yes                            | REF            |            |         |                   |            |         |
| No                             | 0.36           | 0.08-1.58  | 0.263   | 0.21              | 0.027-1.80 | 0.158   |

|                                           |           |                 |       |           |                |       |
|-------------------------------------------|-----------|-----------------|-------|-----------|----------------|-------|
| <b>Washing in a stream</b>                |           |                 |       |           |                |       |
| Yes                                       | REF       |                 |       |           |                |       |
| No                                        | 0.12<br>7 | 0.021-<br>0.781 | 0.026 | 0.67      | 0.49-8.92      | 0.755 |
| <b>Swimming in a stream</b>               |           |                 |       |           |                |       |
| Yes                                       | REF       |                 |       |           |                |       |
| No                                        | 0.40<br>3 | 0.307-<br>2.32  | 0.307 | 0.47      | 0.002-<br>1.42 | 0.078 |
| <b>Perception on Infection prevention</b> |           |                 |       |           |                |       |
| Defecating/urinating in latrine           | REF       |                 |       |           |                |       |
| Wash hands before eating                  | 1.05      | 0.89-<br>12.26  | 0.97  | 0.62      | 0.05-8.05      | 0.718 |
| Other (urinating in contaminated water)   | 1.97      | 0.19-<br>20.21  | 0.57  | 1.11      | 0.093-<br>13.3 | 0.93  |
| <b>Headache</b>                           |           |                 |       |           |                |       |
| Yes                                       | REF       |                 |       |           |                |       |
| No                                        | 0.63      | 0.11-3.57       | 0.601 | 0.53      | 0.06-4.22      | 0.55  |
| <b>Fever</b>                              |           |                 |       |           |                |       |
| Yes                                       | REF       |                 |       |           |                |       |
| No                                        | 0.42      | 0.73-2.40       | 0.33  | 0.29<br>3 | 0.04-1.99      | 0.21  |

|                   |           |           |       |      |                 |       |
|-------------------|-----------|-----------|-------|------|-----------------|-------|
| <b>Body aches</b> |           |           |       |      |                 |       |
| Yes               | REF       |           |       |      |                 |       |
| No                | 0.35<br>2 | 0.06-2.03 | 0.242 | 0.44 | 0.055-<br>3.15  | 0.395 |
| <b>Dysuria</b>    |           |           |       |      |                 |       |
| Yes               | REF       |           |       |      |                 |       |
| No                | 0.16<br>9 | 0.28-1.01 | 0.051 | 1.43 | 0.184-<br>11.12 | 0.733 |

182

## 183 Discussion

184 Urogenital schistosomiasis is a neglected tropical disease caused by *Schistosoma*  
185 *haematobium* that resides in the vasculature surrounding the urogenital system, and is  
186 associated with perturbations in the gut microbiota (20). The disease is prevalent in  
187 several parts of Africa especially in areas with large water bodies. Exposure to infested  
188 water by people during routine agricultural, domestic, occupational, and recreational  
189 activities, is the main channel of disease transmission (9, 10). The infection affects more  
190 than 4 million school-aged children, mostly in rural communities due to unsafe water and  
191 inadequate sanitation facilities (15). Mass treatment of school children has been a regular  
192 exercise often undertaken by governments and stakeholders to decrease the disease  
193 burden and reduce transmission in selected communities.

194 Urogenital schistosomiasis can have unacknowledged devastating impact on the urinary  
195 tract that could have implication for progressive renal damage which, if not detected and  
196 treated, could lead to end stage renal failure and death (21). Looking at the recreational  
197 swimming in school going children as a potent medium for the spread of disease that is  
198 usually asymptomatic (3), periodic screening are warranted to protect the lives of children  
199 and adolescents in communities. Therefore, this study was conducted to assess the  
200 prevalence of urogenital schistosomiasis and to understand associated factors in Maramba  
201 compound of Livingstone city. The study targeted school going children with age ranging  
202 from 10-16 years old. The Compound has a stream that children swim from, and is used as  
203 a source of water for gardening and washing of clothes. We therefore, hypothesized that  
204 school going children may be unregulated to utilize the stream for various recreational  
205 activities and contract the parasites. Our findings showed a low prevalence of 3.47% which  
206 was consistent with similar studies done in Egypt (22) and Ghana (23). However, our  
207 prevalence rate was lower than the 5.3% and 13.9% prevalence rates discovered by  
208 Halwindi *et al.*(24) in Mazabuka and Siavonga districts of Zambia, respectively. The  
209 variations could be attributed to differences in the seasons of data collection, geographical  
210 location, and the sample sizes as they considered five catchment areas while our study only  
211 considered one area with low sample size (comprising 173 participants). A review  
212 study(25) that considered related studies in the central and southern regions of Africa  
213 discovered a prevalence of 73.3%, 47.0% and 33.2% schistosomiasis among school aged  
214 children in the Eastern Cape province of South Africa, Mozambique and Sengerema district  
215 of North-West Tanzania, respectively. Despite several African countries employing the  
216 massive chemotherapy with praziquantel to contain and control the infection, a plethora of

217 literature revealed the presence of the disease in several communities. The questions that  
218 beg answers would be on the effectiveness of the massive treatment program. Should  
219 implementers change the strategies of massive drug administration (MDA) or how potent  
220 are these drugs? Is the pathogen developing resistance or should MDA programs be  
221 simultaneously be implemented with vector control programs in high-risk communities?  
222 These questions can only be answered when implementational research and antimicrobial  
223 resistance studies are conducted putting into consideration that praziquantel rarely  
224 eliminates infection but reduces morbidity and might impact on transmission (26, 27).

225 A study by Gbalégba et al. (28) found males to be nearly two times more likely to be  
226 infected with *S. haematobium* than females (adjusted OR, (aOR) 1.75, 95% CI: 1.11–2.77),  
227 and children at primary school were nearly two times more likely to be infected than those  
228 who did not go to school (aOR 1.79, 95% CI: 1.07–2.99). Our study involved children at  
229 primary school and the male gender was not strongly associated with contracting *S.*  
230 *haematobium* after confounding factors were excluded.

231 In establishing correlates of schistosome infections, variables such as human contact with  
232 water and socio-demographics create a high risk of exposure (29). Our study found that  
233 not living near a stream, not washing in a stream and avoiding swimming in a stream  
234 reduced chances of putting children at risk of contracting schistosome infection by 22%,  
235 67% and 47%, respectively. This was in line with a study done in Mauritania which found  
236 swimming/bathing as the main activity, followed by washing clothes and dishes (28). The  
237 variability of ambient temperature and humidity in sub-Saharan Africa forces children to  
238 have swimming activities and general interaction with water. Therefore, mollusk control



239 programs might prevent disease spread since contact with water may not be avoided by  
240 children.

241 Furthermore, we discovered that an increase in age was associated with an increased odds  
242 of acquiring *S. haematobium* (aOR 2.86; 95% CI: 1.27-6.44,  $p=0.011$ ) and this was similarly  
243 seen in a study in Yemen where the prevalence of *S. haematobium* infection was found  
244 significantly higher in children aged over 10 years and lower in younger ones (30). This  
245 observation could probably be because this age group is often involved in water-contact  
246 activities such as swimming, washing, watering or fishing.

247 Despites clinical manifestations such as headache, fever, skin rash and dysuria having an  
248 association with schistosomiasis, our study found a reduced connection with the infection  
249 after a multivariate analysis. However, hematuria had a strong connection with the  
250 infection because infected participants had it. This was in part similar to a study done  
251 elsewhere (31) which suggested that hematuria presence could act as a predictor of  
252 bilharzia especially in endemic regions.

253 Understanding the health behavior of the target population is key for curbing  
254 schistosomiasis. In a rural area of KwaZulu-Natal, a study showed that basic knowledge  
255 about the risk of schistosomiasis among the participants was high, but the cause and  
256 prevention of the disease were less well understood (32). Elsewhere in Africa, the  
257 community knowledge about prevention and cause of schistosomiasis had been worryingly  
258 low (33, 34). Our study discovered that most participants with the infection had little  
259 knowledge about how it is caused, contracted and the health effects associated with it.  
260 Therefore, it is cardinal to sensitize the risk community about the disease. Primary school

261 teachers should design deliberate policies to educate learners on the cause, transmission  
262 and notable signs/symptoms of schistosomiasis for quicker identification and control of  
263 the infection.

264 The study had its own limitations. Firstly, Maramba stream separates Maramba and  
265 Lubuyu compounds but school going children from Libuyu compound were not considered,  
266 which could have contributed to the low prevalence rate. Secondly, the stream needed to  
267 be assessed for the presence of snail vectors for schistosomes. Thirdly, urinalysis was not  
268 conducted especially in infected individuals to assess the extent of urinary tract damage by  
269 the disease. Finally, the COVID19 pandemic and the misconception that community had  
270 about urine collection led guardians to block urine specimen submission from children.  
271 Therefore, more robust studies are necessary to fully comprehend the extent of the disease  
272 in all the compounds surrounding Maramba stream.

## 273 **Conclusion**

274 The prevalence of urogenital schistosomiasis among school going children in Maramba  
275 compound was 3.47% and the correlates of acquiring *S haematobium* included washing in a  
276 stream, age and poor knowledge on schistosomiasis. Participants that had schistosomiasis  
277 often presented with dysuria and hematuria. Therefore, we recommend that an integrated  
278 program that involves sensitizing the community about schistosomiasis and its  
279 complications as well as hygiene and behavioral change program could be implemented for  
280 easy risk factor modification. The clinic with the help of community health assistants may  
281 work hand-in-hand with the community to periodically screening school going children to

282 capture and treat the asymptomatic individuals. Finally, use of molluscicides on Maramba  
283 stream to control vector infestation could subsequently control urogenital schistosomiasis.

284

## 285 **Acknowledgements**

286 We would like to graciously acknowledge all parents, guardians and teachers of Maramba  
287 school for their unwavering support during data collection, and all the study participants  
288 for their cooperation during specimens and data collection. We would like to further  
289 acknowledge the contribution of the laboratory technologists and staff members of  
290 Maramba clinic for their assistance. Finally, we would like to sincerely thank Dr Benson  
291 Hamooya for his advice on data analysis plan. We thank you all for making this study a  
292 success.

## 293 **References**

- 294 1. WHO. Schistosomiasis 2022 [updated January 8, 2022; March 15, 2022]. Available from:  
295 <https://www.who.int/news-room/fact-sheets/detail/schistosomiasis>.
- 296 2. Nelwan ML. Schistosomiasis: Life Cycle, Diagnosis, and Control. *Current Therapeutic*  
297 *Research*. 2019;91:5-9.
- 298 3. Bamgbola OF. Urinary schistosomiasis. *Pediatric Nephrology*. 2014;29(11):2113-20.
- 299 4. Alemu M, Zigta E, Derbie A. Under diagnosis of intestinal schistosomiasis in a referral  
300 hospital, North Ethiopia. *BMC research notes*. 2018;11(1):1-5.
- 301 5. Wei Y, Huang N, Chen S, Chen D, Li X, Xu J, et al. The diagnosis and treatment  
302 introspection of the first imported case of atypical cerebral schistosomiasis in Guangzhou city.  
303 *Public Library of Science San Francisco, CA USA*; 2018.
- 304 6. Braun L, Grimes JE, Templeton MR. The effectiveness of water treatment processes  
305 against schistosome cercariae: A systematic review. *PLoS neglected tropical diseases*.  
306 2018;12(4):e0006364.

- 307 7. King M, Carson J, Stewart MT, Gobert GN. Revisiting the *Schistosoma japonicum* life  
308 cycle transcriptome for new insights into lung schistosomula development. *Experimental*  
309 *Parasitology*. 2021;223:108080.
- 310 8. Koukounari A, Touré S, Donnelly CA, Ouedraogo A, Yoda B, Ky C, et al. Integrated  
311 monitoring and evaluation and environmental risk factors for urogenital schistosomiasis and  
312 active trachoma in Burkina Faso before preventative chemotherapy using sentinel sites. *BMC*  
313 *Infectious Diseases*. 2011;11(1):191.
- 314 9. Kibira SPS, Ssempebwa JC, Ssenyonga R, Radloff S, Makumbi FE. Schistosomiasis  
315 infection in pre-school aged children in Uganda: a qualitative descriptive study to identify  
316 routes of exposure. *BMC infectious diseases*. 2019;19(1):1-10.
- 317 10. De Necker L. *Bilharzia* and its snail vectors under the spotlight in current study. *Water*  
318 *Wheel*. 2020;19(6):20-3.
- 319 11. Mouahid G, Rognon A, de Carvalho Augusto R, Driguez P, Geyer K, Karinshak S, et al.  
320 Transplantation of schistosome sporocysts between host snails: A video guide. *Wellcome Open*  
321 *Research*. 2018;3.
- 322 12. Senghor B, Diallo A, Sylla SN, Doucouré S, Ndiath MO, Gaayeb L, et al. Prevalence and  
323 intensity of urinary schistosomiasis among school children in the district of Niakhar, region of  
324 Fatick, Senegal. *Parasites & Vectors*. 2014;7(1):5.
- 325 13. Stothard JR, Sousa-Figueiredo JC, Standley C, Van Dam GJ, Knopp S, Utzinger J, et al. An  
326 evaluation of urine-CCA strip test and fingerprick blood SEA-ELISA for detection of urinary  
327 schistosomiasis in schoolchildren in Zanzibar. *Acta Tropica*. 2009;111(1):64-70.
- 328 14. Etim S, Okon O, Oku E, Ukpong G, Ohioma M, Uttah C. Urinary schistosomiasis in a rice-  
329 farming community in Biase Area of Cross River State. *Nigerian Journal of Parasitology*.  
330 2012;33(2).
- 331 15. Kalinda C, Mutengo M, Chimbari M. A meta-analysis of changes in schistosomiasis  
332 prevalence in Zambia: implications on the 2020 elimination target. *Parasitology Research*.  
333 2020;119(1):1-10.
- 334 16. CSO. The population of the districts and wards of Zambia according to the 2010 census.:  
335 City Population; 2020 [cited 2022 16 March 2022]. Available from:  
336 <https://www.citypopulation.de/en/zambia/wards/admin/>.
- 337 17. Colley DG, Bustinduy AL, Secor WE, King CH. Human schistosomiasis. *The Lancet*.  
338 2014;383(9936):2253-64.
- 339 18. Gray DJ, Ross AG, Li Y-S, McManus DP. Diagnosis and management of schistosomiasis.  
340 *BMJ*. 2011;342:d2651-d.
- 341 19. NHS. Schistosomiasis (bilharzia): NHS; 2021 [updated 17 December 2021; cited 2022 16  
342 March 2022]. Available from: <https://www.nhs.uk/conditions/schistosomiasis/>.
- 343 20. Ajibola O, Rowan AD, Ogedengbe CO, Mshelia MB, Cabral DJ, Eze AA, et al. Urogenital  
344 schistosomiasis is associated with signatures of microbiome dysbiosis in Nigerian adolescents.  
345 *Scientific Reports*. 2019;9(1):829.
- 346 21. Antwi S, Aboah KEK, Sarpong CKG. The unacknowledged impact of urinary  
347 schistosomiasis in children: 5 cases from Kumasi, Ghana. *Ghana Med J*. 2014;48(4):228-33.
- 348 22. Barakat RMR. Epidemiology of Schistosomiasis in Egypt: Travel through Time: Review. *J*  
349 *Adv Res*. 2013;4(5):425-32.

- 350 23. Nyarko R, Torpey K, Ankomah A. Schistosoma haematobium, Plasmodium falciparum  
351 infection and anaemia in children in Accra, Ghana. *Tropical Diseases, Travel Medicine and*  
352 *Vaccines*. 2018;4(1):3.
- 353 24. Halwindi H, Magnussen P, Olsen A, Lisulo M. POTENTIAL CONTRIBUTION OF ADULT  
354 POPULATIONS TO THE MAINTENANCE OF SCHISTOSOMIASIS AND SOIL-TRANSMITTED  
355 HELMINTH INFECTIONS IN THE SIAVONGA AND MAZABUKA DISTRICTS OF ZAMBIA. *Journal of*  
356 *Biosocial Science*. 2016;49(2):265-75.
- 357 25. Adenowo AF, Oyinloye BE, Ogunyinka BI, Kappo AP. Impact of human schistosomiasis in  
358 sub-Saharan Africa. *The Brazilian Journal of Infectious Diseases*. 2015;19(2):196-205.
- 359 26. Utzinger J, Zhou X-N, Chen M-G, Bergquist R. Conquering schistosomiasis in China: the  
360 long march. *Acta Trop*. 2005;96(2-3):69-96.
- 361 27. Muhumuza S, Kitimbo G, Oryema-Lalobo M, Nuwaha F. Association between socio  
362 economic status and schistosomiasis infection in Jinja District, Uganda. *Tropical Medicine &*  
363 *International Health*. 2009;14(6):612-9.
- 364 28. Gbalégba NGGC, Silué KD, Ba O, Ba H, Tian-Bi NTY, Yapi GY, et al. Prevalence and  
365 seasonal transmission of Schistosoma haematobium infection among school-aged children in  
366 Kaedi town, southern Mauritania. *Parasites & Vectors*. 2017;10(1):353.
- 367 29. Dabo A, Badawi HM, Bary B, Doumbo OK. Urinary schistosomiasis among preschool-  
368 aged children in Sahelian rural communities in Mali. *Parasites & vectors*. 2011;4(1):1-7.
- 369 30. Sady H, Al-Mekhlafi HM, Mahdy MAK, Lim YAL, Mahmud R, Surin J. Prevalence and  
370 Associated Factors of Schistosomiasis among Children in Yemen: Implications for an Effective  
371 Control Programme. *PLOS Neglected Tropical Diseases*. 2013;7(8):e2377.
- 372 31. Degarege A, Mekonnen Z, Levecke B, Legesse M, Negash Y, Vercruyssen J, et al.  
373 Prevalence of Schistosoma haematobium Infection among School-Age Children in Afar Area,  
374 Northeastern Ethiopia. *PLOS ONE*. 2015;10(8):e0133142.
- 375 32. Mazani E, Taylor M, Kjetland EF, Ndhlovu PD. Knowledge and perceptions about  
376 schistosomiasis among primary school children and teachers in rural KwaZulu-Natal. *S Afr J*  
377 *Infect Dis*. 2020;35(1):126-.
- 378 33. Kabatereine N, Fleming F, Thuo W, Tinkitina B, Tukahebwa EM, Fenwick A. Community  
379 perceptions, attitude, practices and treatment seeking behaviour for schistosomiasis in L.  
380 Victoria islands in Uganda. *BMC Research Notes*. 2014;7(1):900.
- 381 34. Assefa A, Erko B, Gundersen SG, Medhin G, Berhe N. Low awareness and common  
382 misconceptions about schistosomiasis in endemic lowland areas in Western Ethiopia: a mixed-  
383 methods study. *BMC Public Health*. 2021;21(1):1064.

384

385

386

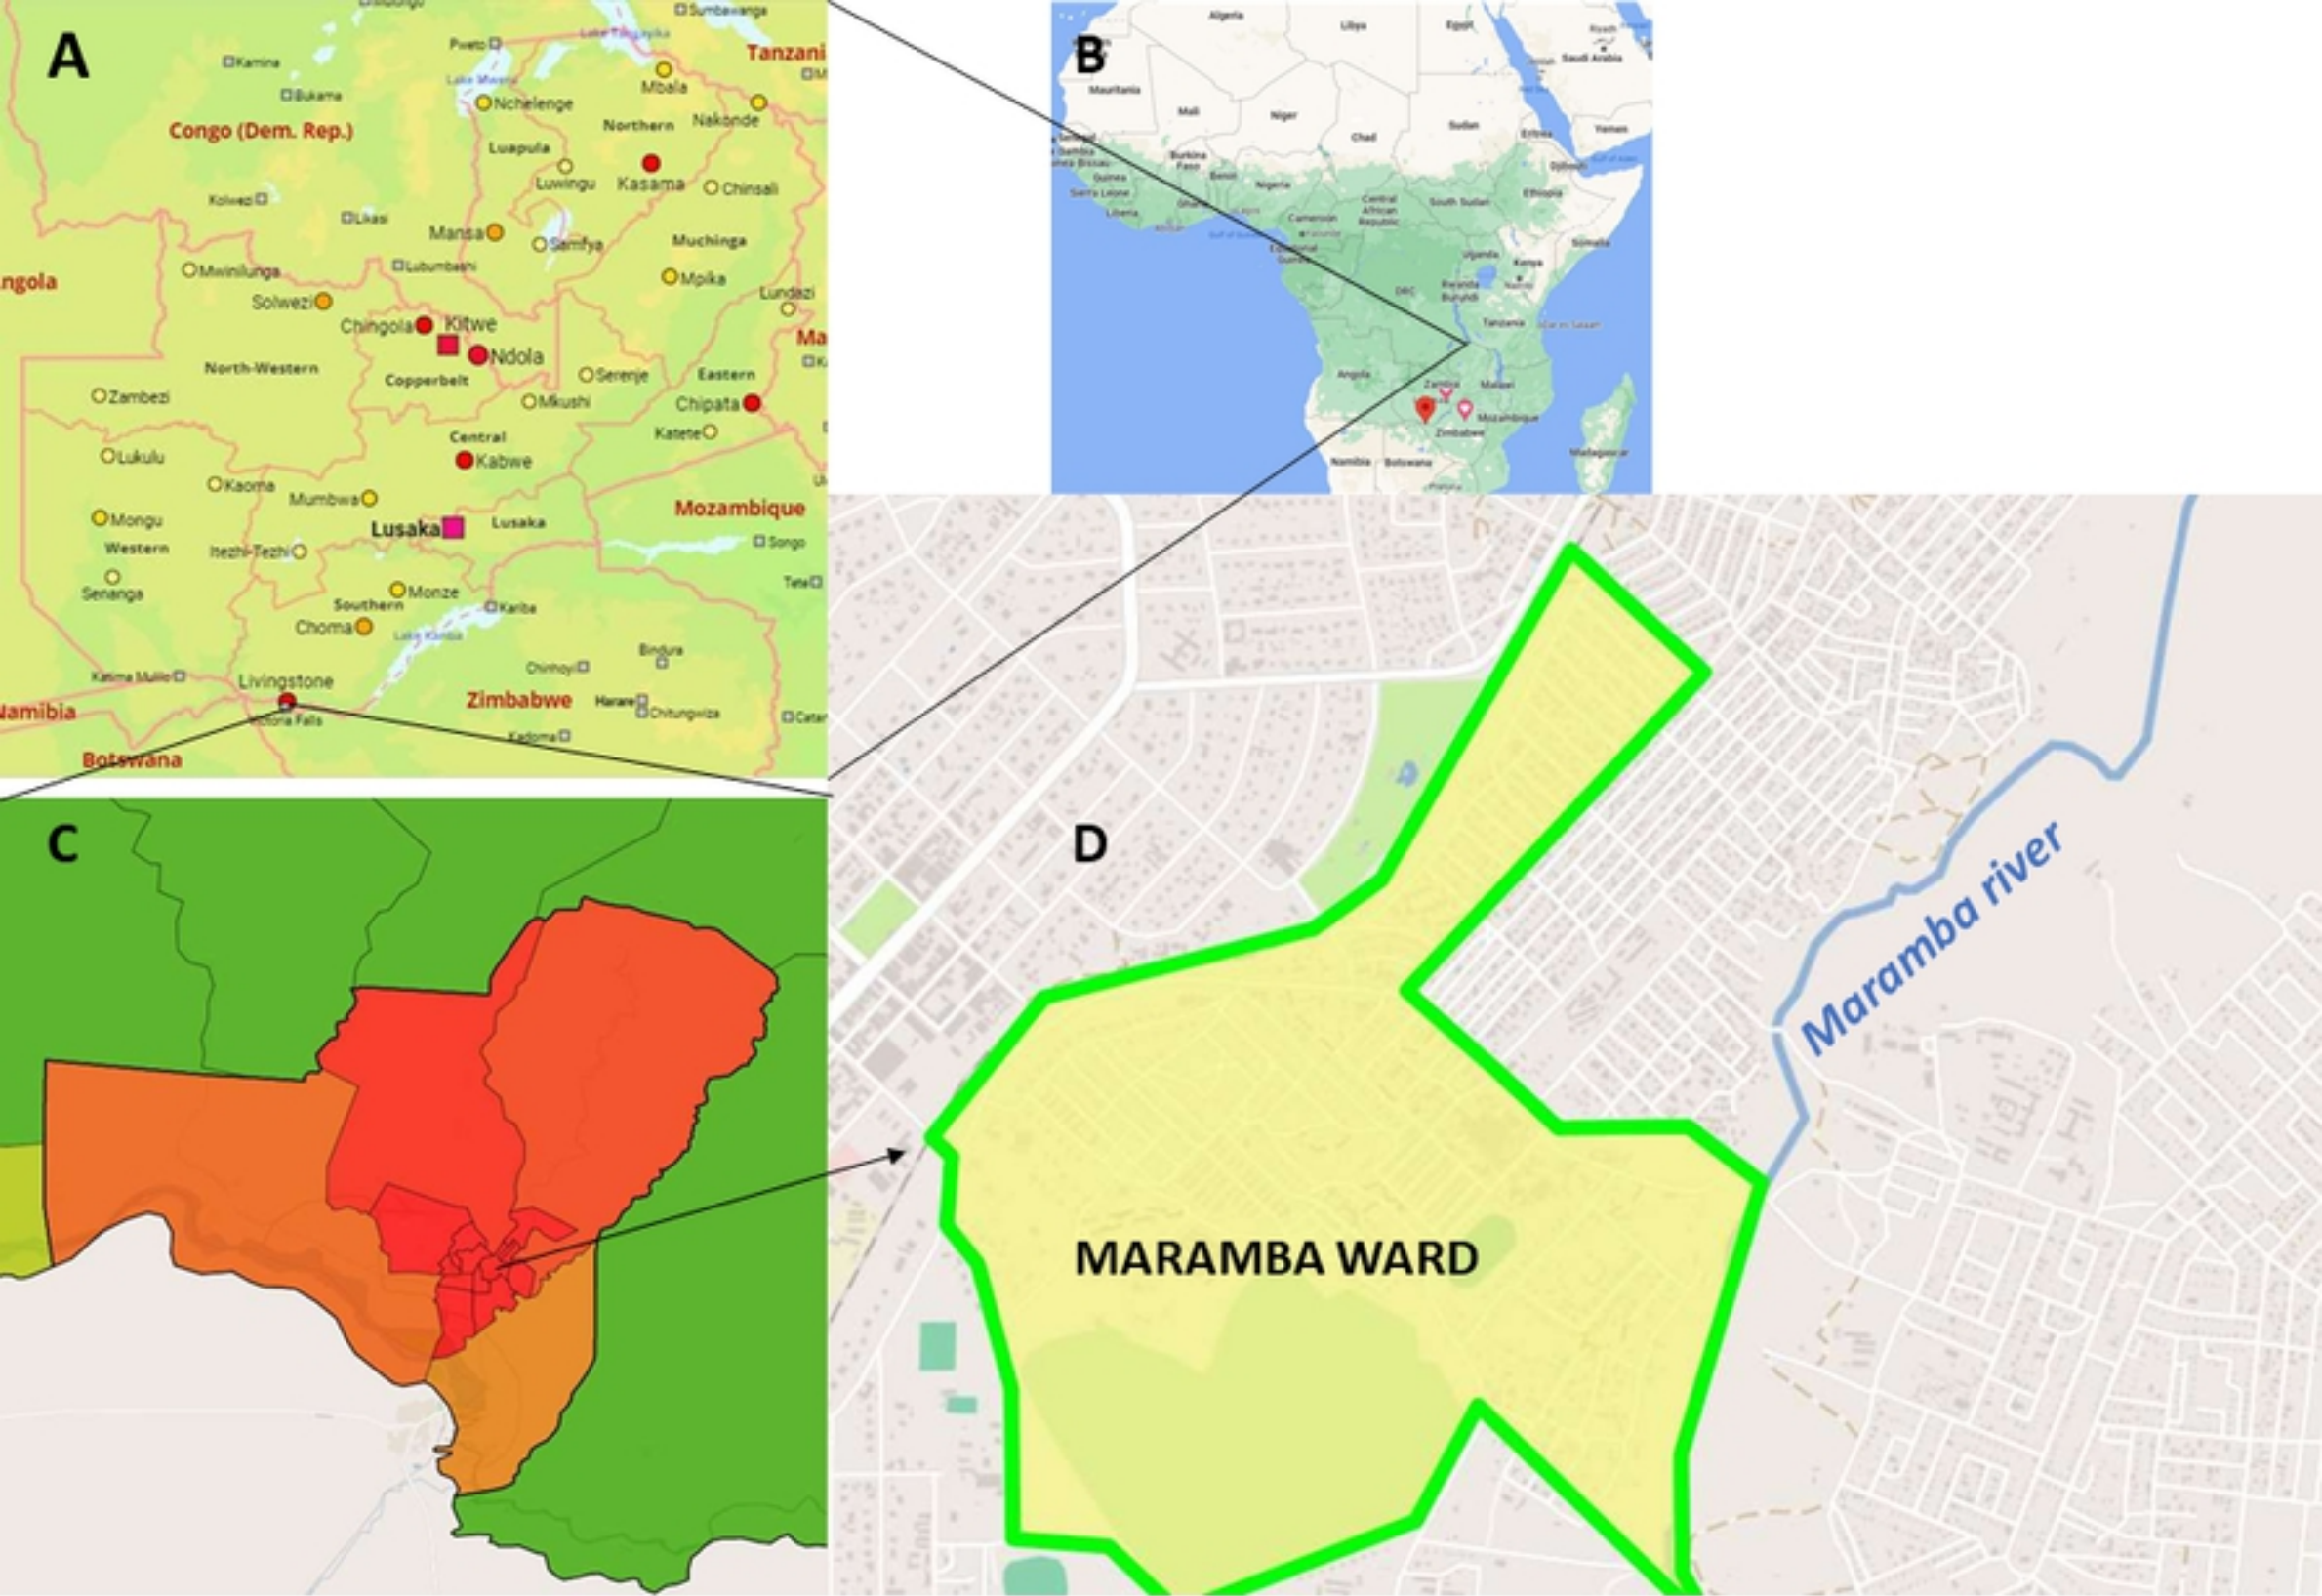

Figure 1
